# Supplementary material for: Development of Quantitative Real-Time PCR and Loop-Mediated Isothermal Amplification Assays for the Surveillance and Diagnosis of Herpes B Virus Infection
Source: MDPI journal article supplement (doi:10.3390/v15102086), 2023-10-13
Supplement: s1 [file s1]

## Supplemental Figures and Table

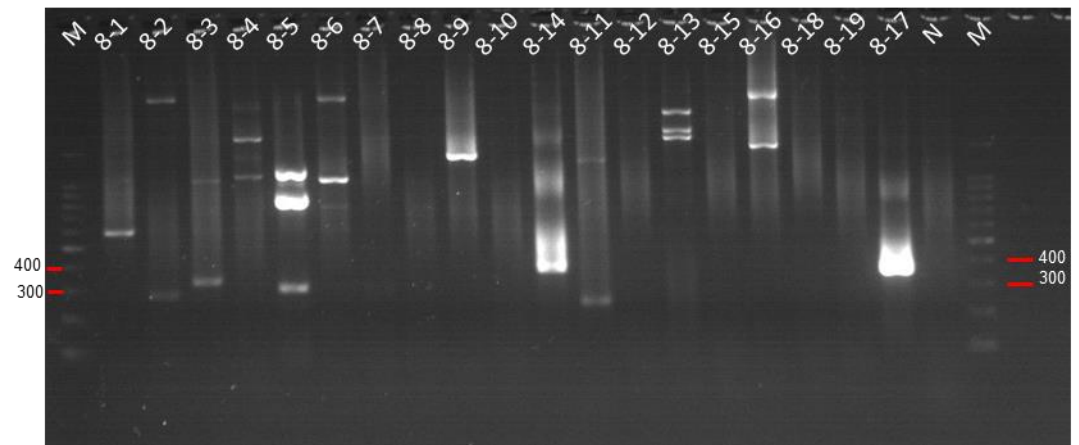

**Figure S1.** Nested PCR for gG-qPCR<sub>positive</sub> samples

Nineteen samples (No.8-1, through 8-19) have been initially detected to be positive by gG-qPCR and further confirmed by nested PCR. The amplicon is 359 bp long. No. 8-1 through 8-19 have been loaded. M; 100 bp DNA ladder. Target bands are identified in No.8-14 and 8-17.

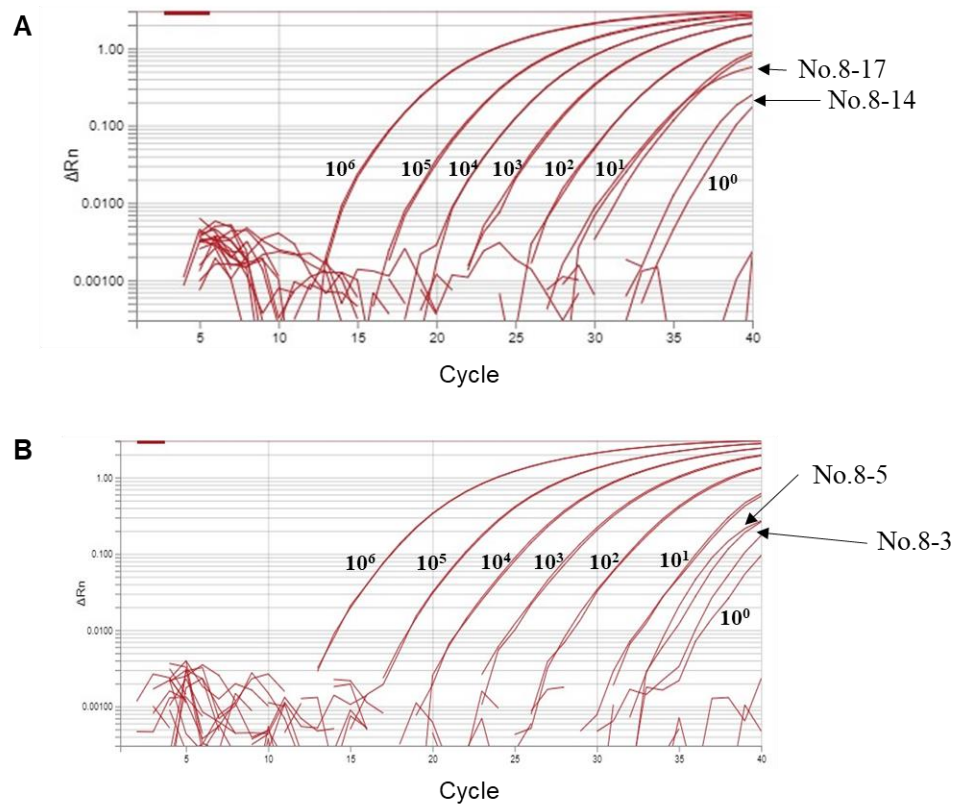

**Figure S2.** qPCR-gG amplification curve of No. 8-14 and No. 8-17 (A), and No. 8-3 and No. 8-5 (B).

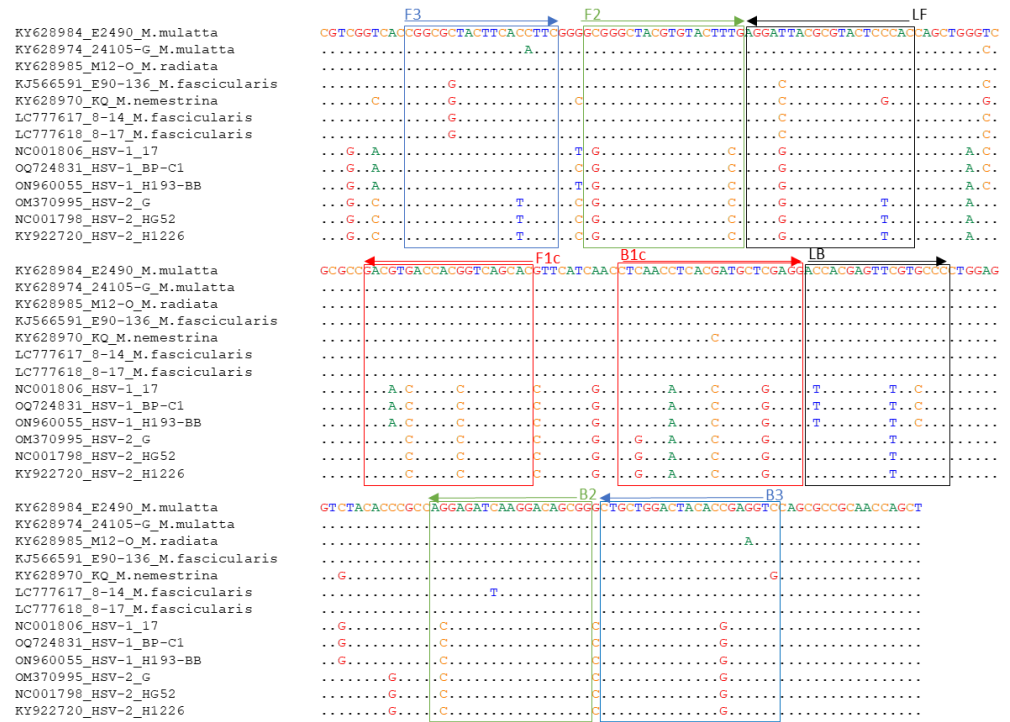

**Figure S3.** Sequence alignments of LAMP primer target regions of the genomes of BV and human herpesviruses (HSV-1 and HSV-2). The accession number of the genome sequence of the viruses are shown on the left.

**Table S1.** Sequences of the primers for conventional PCR and sequencing

| Primer set       | Primer            | Sequence (5'-3')       |
|------------------|-------------------|------------------------|
| UL27-LAMP_1st    | UL27-LAMP_Seq_F1  | ACGTCATCATGCAGAACTCG   |
|                  | UL27-LAMP_Seq_R1  | GGTTGGAGAGGAAGGAGGAC   |
| UL27-LAMP_nested | UL27-LAMP_Seq_F1  | ACGTCATCATGCAGAACTCG   |
|                  | UL27-LAMP_Seq_R2  | GGCCCTCGAAGAAGGAGTAG   |
| gG-qPCR_1st      | gG-qPCR_Seq_F1    | GACCCCGCTACTGCTAC      |
|                  | gG-qPCR_Seq_R1    | CCCACCAGGATCTCGTAGTC   |
| gG-qPCR_nested   | gG-qPCR_Seq_F2    | GCCGAYGTGCACAGACAT     |
|                  | gG-qPCR_Seq_R1    | CCCACCAGGATCTCGTAGTC   |
| UL29-qPCR_1st    | UL29-qPCR_Seq_F1  | CAGTAGCGCAGGATCTGGTTG  |
|                  | UL29-qPCR_Seq_R1  | GCGTGATGGACCTCTTYAACA  |
| UL29-qPCR_nested | UL29-qPCR_Seq_F2  | CAGGATCTGGTTGGCCATGTAG |
|                  | UL29-qPCR_Seq_R1  | GCGTGATGGACCTCTTYAACA  |
| US5-6_1st        | BV_US5-6_PCR_F1   | CGTTTCCTCCCGTGGACTTC   |
|                  | BV_US5-6_PCR_R1   | GTCTGGAACGGGTTCTCCAC   |
| US5-6_nested     | BV_US5-6_PCR_F2   | CTGACCCTGGCCGCCATG     |
|                  | BV_US5-6_PCR_R2   | GGTCCGCTCTCTGCTCCAGCG  |
| US5-6_Seq        | BV_US5-6_Seq_addF | TAAGTGGGAGGGGATAAGG    |
|                  | BV_US5-6_Seq_addR | CCGGCTTTTAAAGGACAAA    |
